# Supplementary material
Source: ML conference proceedings conference paper supplement (https://proceedings.mlr.press/v108/valavi20a.html)
Supplement: Supplementary file [file valavi20a-supp.pdf]

**Proof of Lemma 3.1.** (a)  $\nabla J(L_A(W, S)) = (ES^T A^{-T}, A^T W^T E) = L_{A^{-T}} \nabla J(W, S)$ .

(b)

$$\begin{aligned} DJ(L_A(W, S))[L_A(G, H)] &= \langle \nabla J(L_A(W, S)), L_A(G, H) \rangle = \langle L_{A^{-T}} \nabla J(W, S), L_A(G, H) \rangle \\ &= \langle (\nabla J(W, S)), (G, H) \rangle = DJ(W, S)[(G, H)]. \end{aligned}$$

(c)

$$\begin{aligned} \nabla^2 J(L_A(W, S))[L_A(G, H)] &= \left( (GA)(A^{-1}S)(A^{-1}S)^T + (WA)(A^{-1}H)(A^{-1}S)^T + E(A^{-1}H)^T, \right. \\ &\quad \left. (WA)^T(WA)(A^{-1}H) + (WA)^T(GA)(A^{-1}S) + (GA)^T E \right) \\ &= \left( (GSS^T + WHS^T + EH^T)A^{-T}, (A^T(W^TWH + W^TGS + G^TE)) \right) \\ &= L_{A^{-T}} (\nabla^2 J(W, S)[(G, H)]). \end{aligned}$$

(d) By definition,  $D^2 J(L_A(W, S))[L_A(G, H)] = \langle \nabla^2(L_A(W, S))[L_A(G, H)], L_A(G, H) \rangle$ . Using part (c), the above expression is equal to  $\langle L_{A^{-T}}(\nabla^2 J(W, S)[(G, H)]), L_A(G, H) \rangle = \langle \nabla^2 J(W, S)[(G, H)], (G, H) \rangle = D^2 J(W, S)[(G, H)]$ .  $\square$
